# Supplementary material for: Linking Microbial Functioning and Trophic Pathways to Ecological Status in a Coastal Mediterranean Ecosystem
Source: MDPI journal article supplement (doi:10.3390/w13091325), 2021-05-10
Supplement: s1 [file s1]

Archive with 10 entries (10 files):
- Supplementary  material/Figure S1.pdf
- Supplementary  material/Figure S2.pdf
- Supplementary  material/Figure S3.pdf
- Supplementary  material/Table S1.pdf
- Supplementary  material/Table S2.pdf
- Supplementary  material/Table S3.pdf
- Supplementary  material/Table S4.pdf
- Supplementary  material/Table S5.pdf
- Supplementary  material/Table S6.pdf
- Supplementary  material/Table S7.pdf
