# Supplementary material for: Linking Microbial Functioning and Trophic Pathways to Ecological Status in a Coastal Mediterranean Ecosystem
Source: MDPI journal article supplement (doi:10.3390/w13091325), 2021-05-10
Supplement: s1 [file s1 › Supplementary material/Table S1.pdf]

| <i>Date</i> | <i>Time</i>    | <i>Lat. (°N)</i> | <i>Long. (°E)</i> | <i>Bottom depth</i> | <i>Station</i> | <i>Depths</i> | <i>Sample characteristics</i> | <i>Cluster</i> |
|-------------|----------------|------------------|-------------------|---------------------|----------------|---------------|-------------------------------|----------------|
|             | <i>(local)</i> |                  |                   | <i>m</i>            | <i>n°</i>      | <i>m</i>      |                               |                |
| 2003-05-18  | 7.14           | 41°53' 43        | 16°31' 60         | 101                 | 4              | 0             | surface                       | OS             |
| 2003-05-18  | 7.14           | 41°53' 43        | 16°31' 60         | 101                 | 4              | 45            | pycnocline                    | OS             |
| 2003-05-18  | 7.14           | 41°53' 43        | 16°31' 60         | 101                 | 4              | 70            | max fluorescence              | OS             |
| 2003-05-18  | 7.14           | 41°53' 43        | 16°31' 60         | 101                 | 4              | 98            | bottom                        | IS             |
| 2003-05-18  | 10.10          | 41°49' 60        | 16°18' 94         | 33                  | 7              | 0             | surface                       | CS             |
| 2003-05-18  | 10.10          | 41°49' 60        | 16°18' 94         | 33                  | 7              | 19            | pycnocline                    | CS             |
| 2003-05-18  | 10.10          | 41°49' 60        | 16°18' 94         | 33                  | 7              | 25            | max fluorescence              | CS             |
| 2003-05-18  | 10.10          | 41°49' 60        | 16°18' 94         | 33                  | 7              | 30            | bottom                        | IS             |
| 2003-05-19  | 11.30          | 41°35' 86        | 16°58' 37         | 184                 | 24             | 0             | surface                       | OS             |
| 2003-05-19  | 11.30          | 41°35' 86        | 16°58' 37         | 184                 | 24             | 20            | pycnocline                    | OS             |
| 2003-05-19  | 11.30          | 41°35' 86        | 16°58' 37         | 184                 | 24             | 50            | max fluorescence              | OS             |
| 2003-05-19  | 11.30          | 41°35' 86        | 16°58' 37         | 184                 | 24             | 95            | DCM bottom                    | OS             |
| 2003-05-19  | 11.30          | 41°35' 86        | 16°58' 37         | 184                 | 24             | 180           | bottom                        | DS             |
| 2003-05-19  | 12.45          | 41°35' 40        | 16°47' 35         | 116                 | 25             | 0             | surface                       | OS             |
| 2003-05-19  | 12.45          | 41°35' 40        | 16°47' 35         | 116                 | 25             | 40            | pycnocline                    | OS             |
| 2003-05-19  | 12.45          | 41°35' 40        | 16°47' 35         | 116                 | 25             | 60            | max fluorescence              | OS             |
| 2003-05-19  | 12.45          | 41°35' 40        | 16°47' 35         | 116                 | 25             | 95            | DCM bottom                    | IS             |
| 2003-05-19  | 12.45          | 41°35' 40        | 16°47' 35         | 116                 | 25             | 117           | bottom                        | IS             |
| 2003-05-20  | 12.19          | 41°35' 53        | 16°39' 44         | 99                  | 32             | 0             | surface                       | OS             |
| 2003-05-20  | 12.19          | 41°35' 53        | 16°39' 44         | 99                  | 32             | 30            | Max O2                        | OS             |
| 2003-05-20  | 12.19          | 41°35' 53        | 16°39' 44         | 99                  | 32             | 50            | pycnocline                    | OS             |
| 2003-05-20  | 12.19          | 41°35' 53        | 16°39' 44         | 99                  | 32             | 60            | max fluorescence              | OS             |
| 2003-05-20  | 12.19          | 41°35' 53        | 16°39' 44         | 99                  | 32             | 80            | DCM bottom                    | OS             |
| 2003-05-20  | 12.19          | 41°35' 53        | 16°39' 44         | 99                  | 32             | 98            | bottom                        | IS             |
| 2003-05-20  | 13.44          | 41°34' 73        | 16°31' 90         | 82                  | 33             | 0             | surface                       | OS             |
| 2003-05-20  | 13.44          | 41°34' 73        | 16°31' 90         | 82                  | 33             | 30            | pycnocline                    | IS             |
| 2003-05-20  | 13.44          | 41°34' 73        | 16°31' 90         | 82                  | 33             | 50            | max fluorescence              | IS             |
| 2003-05-20  | 13.44          | 41°34' 73        | 16°31' 90         | 82                  | 33             | 65            | DCM bottom                    | IS             |
| 2003-05-20  | 13.44          | 41°34' 73        | 16°31' 90         | 82                  | 33             | 80            | bottom                        | IS             |
| 2003-05-21  | 0.47           | 41°17' 20        | 17°09' 24         | 258                 | 35             | 0             | surface                       | OS             |
| 2003-05-21  | 0.47           | 41°17' 20        | 17°09' 24         | 258                 | 35             | 40            | pycnocline                    | OS             |
| 2003-05-21  | 0.47           | 41°17' 20        | 17°09' 24         | 258                 | 35             | 70            | max fluorescence              | OS             |
| 2003-05-21  | 0.47           | 41°17' 20        | 17°09' 24         | 258                 | 35             | 80            | DCM bottom                    | OS             |
| 2003-05-21  | 0.47           | 41°17' 20        | 17°09' 24         | 258                 | 35             | 160           | intermediate                  | DS             |
| 2003-05-21  | 0.47           | 41°17' 20        | 17°09' 24         | 258                 | 35             | 257           | bottom                        | DS             |
| 2003-05-21  | 1.30           | 41°12' 41        | 17°05' 94         | 122                 | 36             | 0             | surface                       | OS             |
| 2003-05-21  | 1.30           | 41°12' 41        | 17°05' 94         | 122                 | 36             | 35            | pycnocline                    | OS             |
| 2003-05-21  | 1.30           | 41°12' 41        | 17°05' 94         | 122                 | 36             | 50            | max fluorescence              | OS             |
| 2003-05-21  | 1.30           | 41°12' 41        | 17°05' 94         | 122                 | 36             | 70            | DCM bottom                    | OS             |
| 2003-05-21  | 1.30           | 41°12' 41        | 17°05' 94         | 122                 | 36             | 120           | bottom                        | IS             |
| 2003-05-21  | 3.11           | 41°06' 52        | 17°02' 06         | 50                  | 38             | 0             | surface                       | IS             |
| 2003-05-21  | 3.11           | 41°06' 52        | 17°02' 06         | 50                  | 38             | 20            | pycnocline                    | IS             |
| 2003-05-21  | 3.11           | 41°06' 52        | 17°02' 06         | 50                  | 38             | 30            | max fluorescence              | IS             |
| 2003-05-21  | 3.11           | 41°06' 52        | 17°02' 06         | 50                  | 38             | 48            | bottom                        | IS             |
| 2003-05-24  | 11.08          | 41°34' 19        | 16°23' 80         | 50                  | 39             | 0             | surface                       | IS             |
| 2003-05-24  | 11.08          | 41°34' 19        | 16°23' 80         | 50                  | 39             | 20            | pycnocline                    | IS             |
| 2003-05-24  | 11.08          | 41°34' 19        | 16°23' 80         | 50                  | 39             | 33            | max fluorescence              | IS             |
| 2003-05-24  | 11.08          | 41°34' 19        | 16°23' 80         | 50                  | 39             | 50            | bottom                        | IS             |
| 2003-05-24  | 12.17          | 41°33' 82        | 16°17' 80         | 30                  | 40             | 0             | surface                       | CS             |
| 2003-05-24  | 12.17          | 41°33' 82        | 16°17' 80         | 30                  | 40             | 10            | max fluorescence              | CS             |
| 2003-05-24  | 12.17          | 41°33' 82        | 16°17' 80         | 30                  | 40             | 20            | DCM                           | CS             |
| 2003-05-24  | 12.17          | 41°33' 82        | 16°17' 80         | 30                  | 40             | 29            | bottom                        | CS             |
| 2003-05-24  | 13.03          | 41°33' 65        | 16°13' 35         | 21                  | 41             | 0             | surface                       | CS             |
| 2003-05-24  | 13.03          | 41°33' 65        | 16°13' 35         | 21                  | 41             | 13            | max fluorescence              | CS             |
| 2003-05-24  | 13.03          | 41°33' 65        | 16°13' 35         | 21                  | 41             | 19            | bottom                        | CS             |
| 2003-05-24  | 13.41          | 41°33' 64        | 16°09' 94         | 17                  | 42             | 0             | surface                       | CS             |
| 2003-05-24  | 13.41          | 41°33' 64        | 16°09' 94         | 17                  | 42             | 13            | max fluorescence              | CS             |
| 2003-05-24  | 13.41          | 41°33' 64        | 16°09' 94         | 17                  | 42             | 15            | bottom                        | CS             |
| 2003-05-25  | 13.55          | 41°56' 29        | 16°17' 12         | 50                  | 43             | 0             | surface                       | IS             |
| 2003-05-25  | 13.55          | 41°56' 29        | 16°17' 12         | 50                  | 43             | 25            | pycnocline                    | IS             |
| 2003-05-25  | 13.55          | 41°56' 29        | 16°17' 12         | 50                  | 43             | 35            | max fluorescence              | IS             |
| 2003-05-25  | 13.55          | 41°56' 29        | 16°17' 12         | 50                  | 43             | 45            | bottom                        | IS             |
| 2003-05-25  | 14.23          | 41°55' 78        | 16°14' 19         | 30                  | 44             | 0             | surface                       | CS             |
| 2003-05-25  | 14.23          | 41°55' 78        | 16°14' 19         | 30                  | 44             | 5             | max fluorescence              | CS             |
| 2003-05-25  | 14.23          | 41°55' 78        | 16°14' 19         | 30                  | 44             | 27            | bottom                        | CS             |
