# Supplementary material for: Linking Microbial Functioning and Trophic Pathways to Ecological Status in a Coastal Mediterranean Ecosystem
Source: MDPI journal article supplement (doi:10.3390/w13091325), 2021-05-10
Supplement: s1 [file s1 › Supplementary material/Table S2.pdf]

| Parameters                            | Acronym                | Measurement unit                   |
|---------------------------------------|------------------------|------------------------------------|
| <i>Physical-chemical parameters</i>   |                        |                                    |
| Temperature                           | T                      | °C                                 |
| Salinity                              | S                      | psu                                |
| Density                               | $\delta t$             | $\text{g kg}^{-1}$                 |
| Dissolved Oxygen                      | O <sub>2</sub>         | $\text{ml L}^{-1}$                 |
| Fluorescence                          | Fl                     | $\mu\text{g L}^{-1}$               |
| Orthophosphate                        | PO <sub>4</sub>        | $\mu\text{M}$                      |
| Ammonium                              | NH <sub>4</sub>        | $\mu\text{M}$                      |
| Nitrate                               | NO <sub>3</sub>        | $\mu\text{M}$                      |
| Nitrite                               | NO <sub>2</sub>        | $\mu\text{M}$                      |
| Dissolved Inorganic Nitrogen          | DIN                    | $\mu\text{M}$                      |
| Silicate                              | Si(OH) <sub>4</sub>    | $\mu\text{M}$                      |
| Nitrogen : Phosphorus ratio           | N/P                    |                                    |
| Total chlorophyll a                   | chl <sub>a</sub>       | $\mu\text{g L}^{-1}$               |
| Total phaeopigments                   | phaeo                  | $\mu\text{g L}^{-1}$               |
| <i>Prokaryotic abundances</i>         |                        |                                    |
| PicoPhytoplankton Abundance           | PPA                    | $\text{cells L}^{-1}$              |
| Total Prokaryotic Abundance           | PPT                    | $\text{cells L}^{-1}$              |
| Heterotrophic PicoPlankton abundance  | HPP                    | $\text{cells L}^{-1}$              |
| <i>Prokaryotic morphotypes</i>        |                        |                                    |
| Total cocci (size classes abundances) | Cocci                  | $\text{cells L}^{-1}$              |
| Total rods (size classes abundances)  | Rods                   | $\text{cells L}^{-1}$              |
| <i>Phytoplankton abundances</i>       |                        |                                    |
| Total Phytoplankton                   | Phyto                  | $\text{cells L}^{-1}$              |
| Diatoms                               | Diatoms                | $\text{cells L}^{-1}$              |
| Dinoflagellates                       | Dinoflagellates        | $\text{cells L}^{-1}$              |
| Coccolithoforides                     | Coccolithoforides      | $\text{cells L}^{-1}$              |
| Other Phytoflagellates                | Other Phytoflagellates | $\text{cells L}^{-1}$              |
| <i>Microbial activities</i>           |                        |                                    |
| Total Primary Production              | PP                     | $\mu\text{gC L}^{-1}\text{h}^{-1}$ |
| Prokaryotic Heterotrophic Production  | PHP                    | $\mu\text{gC L}^{-1}\text{h}^{-1}$ |
| Alkaline Phosphatase                  | AP                     | $\text{nmol L}^{-1}\text{h}^{-1}$  |
| Leucine AminoPeptidase                | LAP                    | $\text{nmol L}^{-1}\text{h}^{-1}$  |
| Alpha-Glucosidase                     | a-GLU                  | $\text{nmol L}^{-1}\text{h}^{-1}$  |
| Beta-Glucosidase                      | b-GLU                  | $\text{nmol L}^{-1}\text{h}^{-1}$  |
