# Supplementary material for: Linking Microbial Functioning and Trophic Pathways to Ecological Status in a Coastal Mediterranean Ecosystem
Source: MDPI journal article supplement (doi:10.3390/w13091325), 2021-05-10
Supplement: s1 [file s1 › Supplementary material/Table S3.pdf]

| System    |     | T     | S     | St                 | O <sub>2</sub> | PO <sub>4</sub> | NH <sub>4</sub> | NO <sub>3</sub> | NO <sub>2</sub> | Si(OH) <sub>4</sub> | chl a |                    |         |          | phaco |                    |         |          |
|-----------|-----|-------|-------|--------------------|----------------|-----------------|-----------------|-----------------|-----------------|---------------------|-------|--------------------|---------|----------|-------|--------------------|---------|----------|
|           |     | °C    | PSU   | ml L <sup>-1</sup> |                |                 |                 |                 |                 |                     | Tot.  | > 10 µm            | 10-2 µm | 2-0.5 µm | Tot.  | > 10 µm            | 10-2 µm | 2-0.5 µm |
|           |     |       |       |                    |                |                 |                 |                 |                 |                     |       | µg L <sup>-1</sup> |         |          |       | µg L <sup>-1</sup> |         |          |
| CS        | Max | 19.98 | 38.21 | 28.22              | 6.26           | 0.10            | 0.78            | 1.15            | 0.20            | 1.75                | 1.32  | 0.86               | 0.33    | 0.15     | 0.35  | 0.23               | 0.09    | 0.05     |
|           | Min | 15.99 | 37.29 | 26.52              | 5.50           | 0.01            | 0.12            | 0.35            | 0.04            | 1.13                | 0.19  | 0.05               | 0.04    | 0.02     | 0.05  | 0.01               | 0.00    | 0.01     |
|           | Avg | 18.60 | 37.89 | 27.33              | 5.66           | 0.06            | 0.41            | 0.55            | 0.10            | 1.37                | 0.51  | 0.29               | 0.13    | 0.09     | 0.12  | 0.06               | 0.03    | 0.03     |
|           | SD  | 0.86  | 0.24  | 0.38               | 0.19           | 0.03            | 0.21            | 0.21            | 0.05            | 0.27                | 0.29  | 0.21               | 0.08    | 0.04     | 0.08  | 0.06               | 0.02    | 0.01     |
|           | CV  | 5     | 1     | 1                  | 3              | 58              | 50              | 39              | 50              | 19                  | 56    | 70                 | 63      | 39       | 67    | 99                 | 73      | 43       |
|           | n   | 15    | 15    | 15                 | 15             | 13              | 14              | 14              | 13              | 6                   | 13    | 13                 | 13      | 13       | 13    | 13                 | 13      | 13       |
| IS        | Max | 19.05 | 38.68 | 29.18              | 6.52           | 0.18            | 1.28            | 1.37            | 0.29            | 1.86                | 0.51  | 0.31               | 0.07    | 0.18     | 0.15  | 0.05               | 0.02    | 0.05     |
|           | Min | 12.94 | 38.23 | 27.48              | 5.58           | 0.01            | 0.10            | 0.20            | 0.01            | 0.50                | 0.05  | 0.01               | 0.01    | 0.02     | 0.04  | 0.01               | 0.00    | 0.02     |
|           | Avg | 15.46 | 38.50 | 28.55              | 6.01           | 0.06            | 0.44            | 0.63            | 0.10            | 1.16                | 0.21  | 0.08               | 0.04    | 0.09     | 0.07  | 0.02               | 0.01    | 0.03     |
|           | SD  | 2.06  | 0.14  | 0.56               | 0.28           | 0.04            | 0.37            | 0.39            | 0.08            | 0.56                | 0.13  | 0.09               | 0.02    | 0.04     | 0.03  | 0.01               | 0.01    | 0.01     |
|           | CV  | 13    | 0     | 2                  | 5              | 70              | 84              | 61              | 78              | 48                  | 60    | 117                | 53      | 50       | 46    | 51                 | 56      | 43       |
|           | n   | 22    | 22    | 22                 | 22             | 12              | 14              | 11              | 14              | 4                   | 13    | 11                 | 11      | 11       | 13    | 11                 | 11      | 11       |
| OS        | Max | 19.62 | 38.77 | 29.07              | 6.54           | 0.17            | 1.35            | 1.39            | 0.22            | 1.79                | 0.38  | 0.11               | 0.03    | 0.10     | 0.29  | 0.11               | 0.02    | 0.08     |
|           | Min | 14.02 | 38.62 | 27.63              | 5.51           | 0.01            | 0.12            | 0.15            | 0.01            | 0.18                | 0.03  | 0.01               | 0.00    | 0.02     | 0.02  | 0.01               | 0.00    | 0.01     |
|           | Avg | 15.87 | 38.73 | 28.64              | 5.87           | 0.09            | 0.54            | 0.84            | 0.07            | 0.75                | 0.10  | 0.03               | 0.01    | 0.04     | 0.09  | 0.03               | 0.01    | 0.03     |
|           | SD  | 2.09  | 0.04  | 0.51               | 0.29           | 0.04            | 0.37            | 0.39            | 0.06            | 0.57                | 0.09  | 0.03               | 0.01    | 0.03     | 0.07  | 0.03               | 0.01    | 0.02     |
|           | CV  | 13    | 0     | 2                  | 5              | 46              | 68              | 47              | 80              | 75                  | 85    | 93                 | 52      | 64       | 82    | 82                 | 61      | 67       |
|           | n   | 24    | 24    | 24                 | 24             | 17              | 19              | 16              | 15              | 10                  | 20    | 15                 | 15      | 15       | 19    | 15                 | 15      | 15       |
| DS        | Max | 13.95 | 38.74 | 29.12              | 5.81           | 0.153           | 1.400           | 1.739           | 0.068           |                     |       |                    |         |          |       |                    |         |          |
|           | Min | 13.44 | 38.64 | 29.09              | 5.44           | 0.092           | 0.730           | 1.108           | 0.045           |                     |       |                    |         |          |       |                    |         |          |
|           | Avg | 13.73 | 38.69 | 29.10              | 5.65           | 0.122           | 1.065           | 1.423           | 0.056           |                     |       |                    |         |          |       |                    |         |          |
|           | SD  | 0.26  | 0.05  | 0.02               | 0.19           | 0.043           | 0.474           | 0.446           | 0.016           |                     |       |                    |         |          |       |                    |         |          |
|           | CV  | 2     | 0     | 0                  | 3              | 35              | 44              | 31              | 29              |                     |       |                    |         |          |       |                    |         |          |
|           | n   | 3     | 3     | 3                  | 3              | 2               | 2               | 2               | 2               |                     |       |                    |         |          |       |                    |         |          |
| GULF area | Max | 19.98 | 38.77 | 29.18              | 6.54           | 94.08           | 0.27            | 0.18            | 0.29            | 1.74                | 1.32  | 0.86               | 0.33    | 0.18     | 0.35  | 0.23               | 0.09    | 0.08     |
|           | Min | 12.94 | 37.29 | 26.52              | 5.44           | 77.51           | 0.01            | 0.01            | 0.01            | 0.15                | 0.03  | 0.01               | 0.00    | 0.02     | 0.02  | 0.01               | 0.00    | 0.01     |
|           | Avg | 16.27 | 38.45 | 28.32              | 5.86           | 86.01           | 0.09            | 0.07            | 0.09            | 0.72                | 0.25  | 0.13               | 0.06    | 0.07     | 0.09  | 0.04               | 0.02    | 0.03     |
|           | SD  | 2.25  | 0.36  | 0.74               | 0.29           | 4.19            | 0.06            | 0.04            | 0.06            | 0.39                | 0.24  | 0.17               | 0.07    | 0.04     | 0.07  | 0.04               | 0.02    | 0.02     |
|           | CV  | 14    | 1     | 3                  | 5              | 5               | 74              | 57              | 70              | 54                  | 98    | 130                | 118     | 58       | 72    | 100                | 85      | 52       |
|           | n   | 64    | 64    | 64                 | 64             | 64              | 64              | 44              | 44              | 43                  | 46    | 39                 | 39      | 39       | 45    | 39                 | 39      | 39       |
