# Supplementary material for: Linking Microbial Functioning and Trophic Pathways to Ecological Status in a Coastal Mediterranean Ecosystem
Source: MDPI journal article supplement (doi:10.3390/w13091325), 2021-05-10
Supplement: s1 [file s1 › Supplementary material/Table S4.pdf]

| System       | PPA                   |         | PPT     |         | PPT                   |               |              |             |             |             |             |             | Phytoplankton         |         |                 |                   |                        |
|--------------|-----------------------|---------|---------|---------|-----------------------|---------------|--------------|-------------|-------------|-------------|-------------|-------------|-----------------------|---------|-----------------|-------------------|------------------------|
|              |                       |         |         |         | Cocci 0.5 µm          | Cocci 0.85 µm | Cocci 1.0 µm | Rods 1.0 µm | Rods 1.5 µm | Rods 2.0 µm | Rods 2.5 µm | Rods 3.0 µm | Total                 | Diatoms | Dinoflagellates | Coccolithophorids | Other<br>Phytoplankton |
|              | cells L <sup>-1</sup> |         |         |         | cells L <sup>-1</sup> |               |              |             |             |             |             |             | cells L <sup>-1</sup> |         |                 |                   |                        |
| CS           | Max                   | 1.5E+07 | 5.3E+08 | 1.7E+08 | 8.7E+07               | 0.0E+00       | 1.7E+08      | 7.9E+07     | 2.7E+07     | 1.2E+07     | 1.9E+06     | 1.3E+05     | 9.2E+04               | 1.6E+04 | 7.3E+03         | 4.1E+04           |                        |
|              | Min                   | 2.3E+06 | 4.0E+07 | 2.8E+07 | 0.0E+00               | 0.0E+00       | 1.0E+07      | 0.0E+00     | 0.0E+00     | 0.0E+00     | 0.0E+00     | 4.8E+04     | 9.8E+03               | 1.8E+03 | 0.0E+00         | 1.2E+04           |                        |
|              | Avg                   | 7.1E+06 | 1.9E+08 | 6.9E+07 | 2.0E+07               | 0.0E+00       | 7.0E+07      | 2.2E+07     | 4.5E+06     | 9.2E+05     | 1.3E+05     | 7.8E+04     | 4.0E+04               | 7.9E+03 | 1.5E+03         | 2.9E+04           |                        |
|              | SD                    | 3.5E+06 | 1.1E+08 | 3.5E+07 | 2.2E+07               | 0.0E+00       | 4.2E+07      | 2.2E+07     | 8.5E+06     | 3.1E+06     | 4.9E+05     | 2.3E+04     | 2.4E+04               | 4.2E+03 | 1.8E+03         | 7.0E+03           |                        |
|              | CV                    | 50      | 59      | 52      | 111                   | 0             | 60           | 98          | 192         | 335         | 387         | 29          | 59                    | 53      | 119             | 24                |                        |
|              | n                     | 16      | 16      | 15      | 15                    | 15            | 15           | 15          | 15          | 15          | 15          | 16          | 16                    | 16      | 16              | 16                |                        |
| IS           | Max                   | 1.6E+07 | 2.7E+08 | 1.1E+08 | 5.0E+07               | 5.7E+06       | 1.0E+08      | 4.9E+07     | 2.0E+07     | 3.2E+06     | 6.3E+05     | 8.8E+04     | 4.3E+04               | 1.1E+04 | 4.4E+03         | 5.4E+04           |                        |
|              | Min                   | 1.6E+06 | 3.0E+07 | 1.6E+07 | 0.0E+00               | 0.0E+00       | 2.0E+07      | 0.0E+00     | 0.0E+00     | 0.0E+00     | 0.0E+00     | 1.8E+04     | 2.2E+03               | 7.3E+02 | 0.0E+00         | 7.3E+03           |                        |
|              | Avg                   | 5.5E+06 | 1.2E+08 | 4.6E+07 | 1.5E+07               | 6.6E+05       | 5.1E+07      | 1.4E+07     | 3.2E+06     | 5.0E+05     | 6.6E+04     | 5.3E+04     | 1.7E+04               | 4.8E+03 | 1.6E+03         | 2.9E+04           |                        |
|              | SD                    | 3.1E+06 | 6.2E+07 | 2.4E+07 | 1.1E+07               | 1.6E+06       | 2.4E+07      | 1.4E+07     | 5.1E+06     | 9.3E+05     | 2.0E+05     | 2.1E+04     | 1.2E+04               | 3.2E+03 | 1.6E+03         | 1.2E+04           |                        |
|              | CV                    | 58      | 50      | 53      | 78                    | 234           | 47           | 98          | 162         | 187         | 300         | 39          | 68                    | 68      | 104             | 43                |                        |
|              | n                     | 22      | 22      | 19      | 19                    | 19            | 19           | 19          | 19          | 19          | 19          | 22          | 22                    | 22      | 22              | 22                |                        |
| OS           | Max                   | 1.5E+07 | 2.1E+08 | 6.4E+07 | 3.2E+07               | 2.5E+06       | 8.2E+07      | 2.3E+07     | 1.1E+07     | 3.2E+06     | 4.4E+06     | 1.4E+05     | 1.0E+05               | 1.6E+04 | 4.4E+03         | 5.8E+04           |                        |
|              | Min                   | 2.5E+05 | 4.9E+07 | 1.3E+07 | 0.0E+00               | 0.0E+00       | 1.0E+07      | 1.9E+06     | 0.0E+00     | 0.0E+00     | 0.0E+00     | 1.5E+04     | 5.8E+03               | 1.5E+03 | 0.0E+00         | 7.3E+03           |                        |
|              | Avg                   | 4.8E+06 | 1.0E+08 | 3.6E+07 | 9.6E+06               | 5.8E+05       | 4.0E+07      | 1.2E+07     | 3.4E+06     | 6.6E+05     | 4.5E+05     | 6.7E+04     | 3.1E+04               | 7.3E+03 | 1.9E+03         | 2.7E+04           |                        |
|              | SD                    | 4.1E+06 | 4.1E+07 | 1.4E+07 | 8.8E+06               | 8.5E+05       | 1.7E+07      | 6.9E+06     | 3.3E+06     | 1.0E+06     | 9.9E+05     | 2.6E+04     | 2.2E+04               | 4.4E+03 | 1.5E+03         | 1.2E+04           |                        |
|              | CV                    | 86      | 40      | 40      | 91                    | 147           | 43           | 58          | 98          | 156         | 222         | 39          | 72                    | 60      | 83              | 44                |                        |
|              | n                     | 24      | 24      | 24      | 24                    | 24            | 24           | 24          | 24          | 24          | 24          | 24          | 24                    | 24      | 24              | 24                |                        |
| DS           | Max                   | 2.3E+03 | 1.3E+05 | 3.5E+04 | 5.7E+03               | 3.1E+04       | 4.9E+04      | 1.0E+04     | 1.9E+03     | 0.0E+00     | 1.3E+05     | 2.7E+04     | 5.8E+03               | 2.6E+03 | 1.5E+03         | 1.8E+04           |                        |
|              | Min                   | 1.9E+02 | 1.0E+05 | 6.9E+03 | 0.0E+00               | 0.0E+00       | 1.1E+04      | 1.3E+03     | 0.0E+00     | 0.0E+00     | 0.0E+00     | 1.7E+04     | 3.6E+03               | 7.3E+02 | 0.0E+00         | 1.0E+04           |                        |
|              | Avg                   | 1.3E+03 | 1.1E+05 | 1.8E+04 | 1.9E+03               | 1.6E+04       | 2.6E+04      | 4.2E+03     | 8.4E+02     | 0.0E+00     | 8.0E+04     | 2.1E+04     | 4.9E+03               | 1.5E+03 | 9.7E+02         | 1.4E+04           |                        |
|              | SD                    | 1.0E+03 | 1.5E+04 | 1.5E+04 | 3.3E+03               | 1.5E+04       | 2.0E+04      | 5.1E+03     | 9.6E+02     | 0.0E+00     | 7.0E+04     | 5.0E+03     | 1.1E+03               | 9.6E+02 | 8.4E+02         | 3.7E+03           |                        |
|              | CV                    | 80      | 13      | 81      | 173                   | 97            | 77           | 121         | 115         | #DIV/0!     | 87          | 23          | 23                    | 66      | 87              | 26                |                        |
|              | n                     | 3       | 3       | 3       | 3                     | 3             | 3            | 3           | 3           | 3           | 3           | 3           | 3                     | 3       | 3               | 3                 |                        |
| GULF<br>area | Max                   | 1.6E+07 | 5.3E+08 | 1.7E+08 | 8.7E+07               | 3.1E+07       | 1.7E+08      | 7.9E+07     | 2.7E+07     | 1.2E+07     | 1.3E+08     | 1.4E+05     | 1.0E+05               | 1.6E+04 | 7.3E+03         | 5.8E+04           |                        |
|              | Min                   | 1.9E+05 | 3.0E+07 | 6.9E+06 | 0.0E+00               | 0.0E+00       | 1.0E+07      | 0.0E+00     | 0.0E+00     | 0.0E+00     | 0.0E+00     | 1.5E+04     | 2.2E+03               | 7.3E+02 | 0.0E+00         | 7.3E+03           |                        |
|              | Avg                   | 5.4E+06 | 1.3E+08 | 4.6E+07 | 1.3E+07               | 1.2E+06       | 5.0E+07      | 1.5E+07     | 3.5E+06     | 6.4E+05     | 4.2E+06     | 6.3E+04     | 2.7E+04               | 6.3E+03 | 1.6E+03         | 2.8E+04           |                        |
|              | SD                    | 3.7E+06 | 7.9E+07 | 2.8E+07 | 1.4E+07               | 4.5E+06       | 3.0E+07      | 1.5E+07     | 5.5E+06     | 1.7E+06     | 2.2E+07     | 2.6E+04     | 2.1E+04               | 4.2E+03 | 1.6E+03         | 1.1E+04           |                        |
|              | CV                    | 69      | 60      | 59      | 108                   | 371           | 59           | 98          | 158         | 268         | 518         | 42          | 78                    | 66      | 98              | 40                |                        |
|              | n                     | 65      | 65      | 61      | 61                    | 61            | 61           | 61          | 61          | 61          | 61          | 65          | 65                    | 65      | 65              | 65                |                        |
