# Supplementary material for: Linking Microbial Functioning and Trophic Pathways to Ecological Status in a Coastal Mediterranean Ecosystem
Source: MDPI journal article supplement (doi:10.3390/w13091325), 2021-05-10
Supplement: s1 [file s1 › Supplementary material/Table S5.pdf]

---

**Bacillariophyceae**

*Amphora* Ehrenberg ex Kützing, 1844 sp.  
*cf. Atheya* sp.  
*Bacteriatrum cf. delicatulum* Cleve 1897  
*Cerataulina pelagica* (Cleve) Hendey 1937  
*Chaetoceros affinis* Lauder 1864  
*Chaetoceros anastomosans* Grunow in Van Heurck 1882  
*Chaetoceros curvisetus* Cleve 1889  
*Chaetoceros decipiens* Cleve 1873  
*Chaetoceros messanensis* Castracane 1875  
*Chaetoceros saltans* Cleve 1897  
*Chaetoceros simplex* Ostenfeld 1902  
*Chaetoceros* spp.  
*Cocconeis scutellum* Ehrenberg 1838  
*Coscinodiscus* sp.  
*Cylindrotheca closterium* (Ehrenberg) Reimann & J.C.Lewin 1964  
*Dactylosolen fragilissimus* (Bergon) Hasle 1996  
*Dactylosolen mediterraneus* (H.Peragallo) H.Peragallo 1892  
*Detonula pumila* (Castracane) Gran 1900  
*Diploneis crabro* (Ehrenberg) Ehrenberg 1854  
*Fragilariopsis* sp.  
*Guinardia flaccida* (Castracane) H. Peragallo 1892  
*Guinardia striata* (Stolterfoth) Hasle in Hasle & Syvertsen 1996  
*Halamphora coffeiformis* (C.Agardh) Mereschkowsky 1903  
*Haslea wawriakae* (Husedt) Simonsen 1974  
*Hemiaulus chinensis* Greville 1865  
*Hemiaulus hauckii* Grunow ex Van Heurck 1882  
*Leptocylindrus danicus* complex  
*Licnophora gracilis* (Ehrenberg) Grunow 1867  
*Lioloma pacificum* (Cupp) Hasle 1996  
*Melosira nummuloides* C.Agardh 1824  
*Navicula transitans* Cleve 1883  
*Navicula* sp.  
*Nitzschia longissima* (Brébisson) Ralfs in Pritchard 1861  
*Nitzschia sigma* (Kützing) W.Smith 1853  
*Nitzschia sigmoidea* (Nitzsch) W.Smith 1853  
*Nitzschia* sp.  
*Plagiotropis lepidoptera* (W.Gregory) Kuntze 1898  
*Pleurosigma angulatum* (J.T.Quckett) W.Smith 1852  
*Pleurosigma elongatum* W.Smith 1852  
*Pleurosigma normanii* Ralfs in Pritchard 1861  
*Pleurosigma* spp.  
*Proboscia alata* (Brightwell) Sundström 1986  
*Pseudo-nitzschia cf. calliantha* Lundholm, Moestrup & Hasle in Lundholm & al. 2003  
*Pseudo-nitzschia delicatissima* (Cleve) Heiden 1928 *sensu lato*  
*Pseudo-nitzschia cf. fraudulenta* (Cleve) Hasle 1993  
*Pseudo-nitzschia pseudodelicatissima* (Hasle) Hasle 1993 *sensu lato*  
*Rhizosolenia imbricata* Brightwell 1858  
*Rhizosolenia styliformis* T.Brightwell 1858  
*Tenuicylindrus belgicus* (Meunier) D.Nanjappa & A.Zingone in Nanjappa & al. 2013  
*Thalassionema bacillare* (Heiden) Kolbe 1955  
*Thalassionema frauenfeldii* (Grunow) Tempère & Peragallo 1910  
*Thalassiosira gravida* Cleve 1896  
*Thalassiosira* sp.  
*Thalassiothrix longissima* Cleve & Grunow 1880  
Undetermined centric diatoms  
Undetermined pennate diatoms

**Dinophyceae**

*Alexandrium* sp.  
*Dinophysis cf. pusilla* Jørgensen 1923  
*Dinophysis sacculus* Stein 1883  
*Dinophysis* sp.  
*Diplopsalis* group  
*Gonyaulax milneri* (G.Murray & Whitting) Kofoid 1911  
*Gonyaulax spinifera* (Claparède & Lachmann) Diesing 1866  
*Gonyaulax* sp.  
*Gymnodinium marinum* Kent 1880  
*Gymnodinium minus* Lebour 1917  
*Gymnodinium* sp.  
*Gyrodinium fusiforme* Kofoid & Swezy 1921  
*Gyrodinium* sp.  
*Heterocapsa niei* (Loeblich III) L.C.Morrill & Loeblich III 1981  
*Lebourdinium glaucum* (Lebour) F.Gómez, H.Takayam, D.Moreira & P.López-García 2016  
*Micranthodinium bacilliferum* (Schiller) Deflandre 1937  
*Nociluca scintillans* (Macartney) Kofoid & Swezy 1921  
*Orytoxum adriaticum* Schiller 1937  
*Orytoxum caudatum* Schiller 1937  
*Orytoxum scolopax* F.Stein 1883  
*Orytoxum variabile* J.Schiller 1937  
*Orytoxum* sp.  
*Phalacroma rotundatum* (Claparède & Lachmann) Kofoid & J.R.Michener 1911  
*Pronociluca spinifera* (Lohmann) Schiller 1932  
*Prorocentrum cordatum* (Ostenfeld) J.D.Dodge 1976  
*Prorocentrum gracile* F.Schütt 1895  
*Prorocentrum micans* Ehrenberg 1834  
*Protoperidinium bipes* (Paulsen) Balech 1974  
*Protoperidinium crassipes* (Kofoid) Balech 1974  
*Protoperidinium depressum* (Bailey) Balech 1974  
*Protoperidinium longipes* Balech 1974  
*Protoperidinium ovum* (J.Schiller) Balech 1974  
*Scrippsiella acuminata* (Ehrenberg) Kretschmann, Elbrächter, Zinssmeister, S.Soehner, Kirsch, Kusber & Gottschling 2015  
*Tripos candelabrum* (Ehrenberg) F.Gómez 2013  
*Tripos furca* (Ehrenberg) F.Gómez 2013  
*Tripos longipes* (Bailey) F.Gómez 2013  
*Tripos macroceros* (Ehrenberg) Hallegraeff & Huisman in Hallegraeff & al. 2020  
*Tripos massiliensis* (Gourret) F.Gómez 2013  
*Tripos muelleri* Bory 1826  
*Tripos seta* (Ehrenberg) F.Gómez 2013  
*Triposolenia* sp.  
*Tryblionella compressa* (Bailey) Poulin in Poulin & al. 1990  
Undetermined naked dinoflagellates  
Undetermined thecate dinoflagellates

**Prymnesiophyceae**

*Emiliania huxleyi* (Lohmann) W.W.Hay & H.P.Mohler in W.W.Hay & al. 1967  
*Rhabdosphaera clavigera* G.Murray & Blackman 1898  
Undetermined coccolithophores

**Other phytoplankton**

*Dicyochoa fibula* Ehrenberg 1839  
*Tetraselmis* sp.  
Undetermined Cryptophyceae  
Undetermined Euglenophyceae  
Undetermined phytoflagellates

---
