# Supplementary material for: Linking Microbial Functioning and Trophic Pathways to Ecological Status in a Coastal Mediterranean Ecosystem
Source: MDPI journal article supplement (doi:10.3390/w13091325), 2021-05-10
Supplement: s1 [file s1 › Supplementary material/Table S6.pdf]

| <i>System</i> |     | PP                                  |                    |                    |                     | PHP                                 | AP                   | LAP   | <i>a</i> -Glu | <i>b</i> -Glu |
|---------------|-----|-------------------------------------|--------------------|--------------------|---------------------|-------------------------------------|----------------------|-------|---------------|---------------|
|               |     | Tot.                                | > 10 $\mu\text{m}$ | 10-2 $\mu\text{m}$ | 2-0.5 $\mu\text{m}$ |                                     |                      |       |               |               |
|               |     | $\mu\text{gC L}^{-1} \text{h}^{-1}$ |                    |                    |                     | $\mu\text{gC L}^{-1} \text{h}^{-1}$ | $\text{nmol h}^{-1}$ |       |               |               |
| CS            | Max | 6.537                               | 2.836              | 1.925              | 2.296               | 0.580                               | 75.16                | 31.77 | 2.104         | 2.899         |
|               | Min | 0.347                               | 0.113              | 0.089              | 0.144               | 0.096                               | 22.94                | 1.63  | 0.104         | 0.238         |
|               | Avg | 2.390                               | 1.190              | 0.711              | 0.489               | 0.307                               | 41.95                | 14.21 | 0.937         | 1.169         |
|               | SD  | 2.031                               | 1.044              | 0.653              | 0.685               | 0.147                               | 12.88                | 9.04  | 0.631         | 0.780         |
|               | CV  | 85                                  | 88                 | 92                 | 140                 | 48                                  | 31                   | 64    | 67            | 67            |
|               | n   | 9                                   | 9                  | 9                  | 9                   | 15                                  | 15                   | 14    | 15            | 15            |
| IS            | Max | 3.768                               | 1.113              | 0.530              | 2.495               | 0.374                               | 70.46                | 80.97 | 1.936         | 1.818         |
|               | Min | 0.499                               | 0.145              | 0.060              | 0.100               | 0.008                               | 1.09                 | 0.41  | 0.030         | 0.003         |
|               | Avg | 1.836                               | 0.571              | 0.250              | 1.014               | 0.086                               | 26.64                | 20.42 | 0.481         | 0.485         |
|               | SD  | 1.190                               | 0.383              | 0.158              | 0.985               | 0.083                               | 20.05                | 21.95 | 0.528         | 0.568         |
|               | CV  | 65                                  | 67                 | 63                 | 97                  | 96                                  | 75                   | 107   | 110           | 117           |
|               | n   | 8                                   | 8                  | 8                  | 8                   | 21                                  | 21                   | 21    | 20            | 18            |
| OS            | Max | 1.487                               | 0.916              | 0.319              | 0.842               | 0.106                               | 183.26               | 73.65 | 2.347         | 1.428         |
|               | Min | 0.391                               | 0.110              | 0.017              | 0.188               | 0.010                               | 0.62                 | 1.91  | 0.011         | 0.027         |
|               | Avg | 0.820                               | 0.295              | 0.105              | 0.420               | 0.044                               | 35.72                | 23.40 | 0.589         | 0.402         |
|               | SD  | 0.356                               | 0.254              | 0.081              | 0.203               | 0.027                               | 43.86                | 19.77 | 0.627         | 0.395         |
|               | CV  | 43                                  | 86                 | 78                 | 48                  | 61                                  | 123                  | 84    | 106           | 98            |
|               | n   | 10                                  | 10                 | 10                 | 10                  | 20                                  | 24                   | 24    | 23            | 24            |
| DS            | Max |                                     |                    |                    |                     | 0.072                               | 183.81               | 12.69 | 0.300         | 0.416         |
|               | Min |                                     |                    |                    |                     | 0.005                               | 0.38                 | 0.83  | 0.010         | 0.072         |
|               | Avg |                                     |                    |                    |                     | 0.030                               | 61.53                | 6.43  | 0.190         | 0.244         |
|               | SD  |                                     |                    |                    |                     | 0.037                               | 105.89               | 5.96  | 0.157         | 0.243         |
|               | CV  |                                     |                    |                    |                     | 123                                 | 172                  | 93    | 83            | 100           |
|               | n   |                                     |                    |                    |                     | 3                                   | 3                    | 3     | 3             | 2             |
| GULF<br>area  | Max | 6.537                               | 2.836              | 1.925              | 2.495               | 0.580                               | 183.81               | 80.97 | 2.347         | 2.899         |
|               | Min | 0.347                               | 0.110              | 0.017              | 0.100               | 0.005                               | 0.38                 | 0.41  | 0.010         | 0.003         |
|               | Avg | 1.644                               | 0.675              | 0.350              | 0.619               | 0.125                               | 35.41                | 19.49 | 0.620         | 0.617         |
|               | SD  | 1.469                               | 0.740              | 0.460              | 0.699               | 0.140                               | 36.22                | 18.57 | 0.606         | 0.642         |
|               | CV  | 89                                  | 110                | 132                | 113                 | 112                                 | 102                  | 95    | 98            | 104           |
|               | n   | 27                                  | 27                 | 27                 | 27                  | 59                                  | 63                   | 62    | 61            | 59            |
