# Supplementary material for: Linking Microbial Functioning and Trophic Pathways to Ecological Status in a Coastal Mediterranean Ecosystem
Source: MDPI journal article supplement (doi:10.3390/w13091325), 2021-05-10
Supplement: s1 [file s1 › Supplementary material/Table S7.pdf]

| System | Succession phase * | micro/nano Diatoms | AN   | Trophic pathway | Export vs Recycling | Gi   | PP/PHP           | LAP/AP            | OM quality (LAP/b-GLU) | Ecological status |
|--------|--------------------|--------------------|------|-----------------|---------------------|------|------------------|-------------------|------------------------|-------------------|
| CS     | II                 | High<br>44.5       | Low  | H               | >1                  | >1   | Low<br>(13.9)    | Low<br>(<1)       | Low<br>(<20)           | HIGH              |
| IS     | I-II               | Medium<br>2.72     | High | M               | 1=1                 | 1    | High<br>(29.8)   | Medium<br>(1<x<3) | High<br>(>200)         | MODERATE          |
| OS     | I                  | Low<br>0.49        | High | Mi              | < 1                 | n.d. | Medium<br>(20.0) | High<br>(3<x<4)   | Medium<br>(>100)       | GOOD              |
