# Supplementary figures and images for: Linking Microbial Functioning and Trophic Pathways to Ecological Status in a Coastal Mediterranean Ecosystem
Source: MDPI journal article supplement (doi:10.3390/w13091325), 2021-05-10

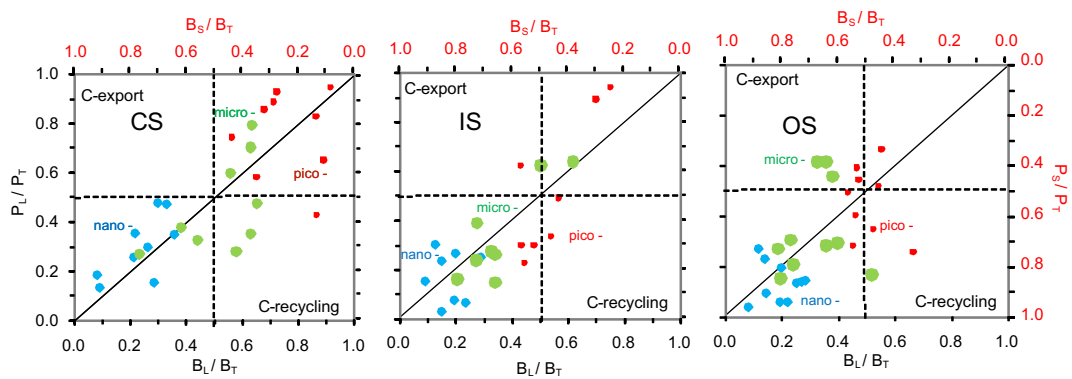

Supplement: s1 [file s1 › Supplementary material/Figure S2.pdf]

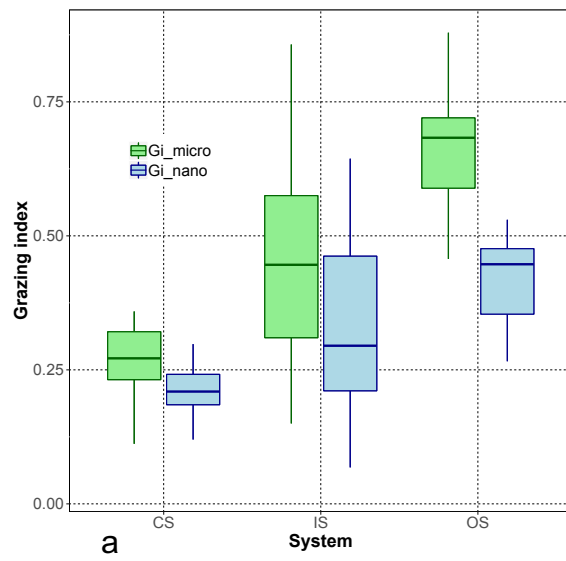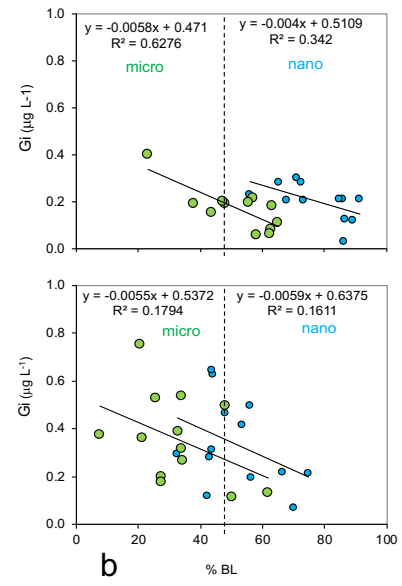

Supplement: s1 [file s1 › Supplementary material/Figure S3.pdf]
